# Supplementary material for: Facile fabrication of ZSM-5 zeolite hollow spheres for catalytic conversion of methanol to aromatics
Source: Royal Society of Chemistry journal article supplement (doi:10.1039/c6cy02476a), 2016-12-28
Supplement: c6cy02476a1.pdf [file c6cy02476a1.pdf]

Electronic Supplementary Information (ESI)

## Supporting Information For

### **Facile Fabrication of ZSM-5 Zeolite Hollow Spheres for Catalytic Conversion of Methanol to Aromatics**

Kai Wang<sup>a,b</sup>, Mei Dong<sup>a,\*</sup>, Junfen. Li<sup>a</sup>, Ping Liu<sup>a</sup>, Kan Zhang<sup>a</sup>, Jianguo. Wang<sup>a</sup>, Weibin. Fan<sup>a,\*</sup>

<sup>a</sup>State Key Laboratory of Coal Conversion, Institute of Coal Chemistry, Chinese Academy of Sciences, 27 South Taoyuan Road, Taiyuan, Shanxi 030001, China.

<sup>b</sup>University of Chinese Academy of Sciences, Beijing 100049, China.

\*Corresponding author. Tel.: +86-351-4199009; Fax: +86-351-4041153; E-mail address: fanwb@sxicc.ac.cn (Wei B. Fan); mdong@sxicc.ac.cn (M. Dong).

---

## Experimental Details

### Sample preparation

The synthesis gel for the synthesis of ZSM-5 zeolite hollow spheres was prepared according to the following procedures. First, required amounts of sodium aluminate (41 wt.% of  $\text{Al}_2\text{O}_3$ , 41 wt.% of  $\text{Na}_2\text{O}$ , Sinopharm Chem. Reagent Co., Ltd.) and sodium hydroxide (96 wt%, Sinopharm Chem. Reagent Co., Ltd.) were dissolved in deionized water. Then, certain amounts of n-butylamine (NBA, 99 wt.%, Jiangsu Fengyuan Bioengineering Co., Ltd.), ethylenediaminetetraacetic acid disodium salt ( $\text{Na}_2$ -EDTA) and silica sol (40.5 wt.% of  $\text{SiO}_2$ , Qingdao Haiyang Chem. Co., Ltd.) were subsequently added and stirred up to formation of a homogeneous gel. The resultant gel has a chemical composition of  $\text{SiO}_2$ : 0.14  $\text{Al}_2\text{O}_3$ : 0.09  $\text{Na}_2\text{O}$ : 31  $\text{H}_2\text{O}$ : 0.15 NBA: 0.08  $\text{Na}_2$ -EDTA. The crystallization was conducted at 170 °C for 0 to 38 h in a Teflon-lined autoclave. The solid product was centrifuged, washed, dried and calcined at 550 °C for 10 h in air. This is followed by ion-exchanging with aqueous  $\text{NH}_4\text{NO}_3$  solution (1 M,  $m(\text{liquid})/m(\text{solid}) = 40$ ) for 4 h at 80 °C and subsequent calcining at 550 °C for 6 h. The obtained sample was designated as ZSM-5-h(*n*) with *n* representing the crystallization time.

For investigation of the crystallization mechanism, the samples were synthesized by adding different amounts of NaCl or  $\text{Na}_2$ -EDTA (Table S1).

### Sample characterization

X-ray powder diffraction (XRD) patterns of as-synthesized samples were recorded on a Rigaku MiniFlex II desktop X-ray diffractometer with monochromated  $\text{Cu K}\alpha$  radiation (154.06 pm, 30 kV and 15 mA). Taking the ZSM-5-b4 sample (Table S1) as a reference (it has a crystallinity of 100%), and the relative crystallinity of other samples was estimated by comparing the total area of the peaks at  $2\theta$  between 22.5° and 25° with that of the reference sample. The scanning electron microscopy (SEM) images to characterize the surface

---

morphology of sample were taken on a field emission scanning electron microscope (JSM 7001-F, JEOL, Japan). The high-resolution transmission electron microscopy (HRTEM) images of samples were measured on a field emission transmission electron microscope (JEM 2100-F, JEOL, Japan) operating at 200 kV. The  $^{29}\text{Si}$  and  $^{27}\text{Al}$  MAS NMR spectra were measured on Bruker Avance III 600 MHz Wide Bore spectrometer operating at a magnetic field of 14.2 T. The  $^{27}\text{Al}$  MAS NMR spectra were acquired at a spinning rate of 13 kHz with a  $\pi/12$  pulse width of 1.0  $\mu\text{s}$  and a recycle delay of 1 s. The  $^{29}\text{Si}$  MAS NMR spectra were obtained at a spinning rate of 5 kHz with a  $\pi/2$  pulse width of 6  $\mu\text{s}$  and a recycle delay of 20 s.

The amount of silicon and aluminum element in the mother liquid or solid samples of synthesis systems was determined by inductively coupled plasma atomic emission spectroscopy (ICP-AES, Autoscan16, TJA). Nitrogen adsorption/desorption isotherms were measured at -195.8 °C on a TriStar II 3020 gas adsorption analyzer. Prior to the measurement, the zeolite sample was degassed under high vacuum at 300 °C for 8 h. The surface area was calculated from the adsorption branch in the range of relative pressure from 0.05 to 0.25 by Brunauer–Emmett–Teller (BET) method, the micropore volume was calculated from the isotherms by t-Plot method, and total pore volume was estimated in terms of the relative pressure of 0.99. The mesopore volume was obtained from the difference between the total pore volume and micropore volume.

Temperature-programmed desorption of  $\text{NH}_3$  ( $\text{NH}_3$ -TPD) was performed on a Micromeritics AutoChem II 2920 chemisorption analyzer. Approximately 100 mg of zeolite sample was first pretreated at 550 °C for 2 h in an argon stream (30 mL  $\text{min}^{-1}$ ) and then cooled to 120 °C. Saturated adsorption of  $\text{NH}_3$  on the zeolite sample was achieved by introducing gaseous  $\text{NH}_3$  (5 vol % in argon, 30 mL  $\text{min}^{-1}$ ) into the sample tube for 30 min. After that, the physically adsorbed  $\text{NH}_3$  was removed by flushing the sample tube with the argon flow (30 mL  $\text{min}^{-1}$ ) at 120 °C for 2 h. To get the  $\text{NH}_3$ -TPD profile, the zeolite sample was then heated up from 120 to 550 °C at a ramp of 10 °C  $\text{min}^{-1}$ ; the amount of  $\text{NH}_3$  released

---

during heating for desorption was measured by a thermal conductivity detector (TCD). The quantities of weak and strong acid sites were determined by the amounts of ammonia desorbed at 120–250 and 250–550 °C, respectively.

Pyridine-adsorption infrared (Py-IR) spectrum was measured on a Bruker Tensor 27 FT-IR spectrometer. Before collecting the spectrum, the self-supported sample wafer was evacuated at 450 °C and  $10^{-2}$  Pa for 2 h, and cooled to room temperature subsequently. Then Pyridine vapor was introduced into the sample cell for 1 h. The spectrum was collected after the sample wafer after evacuation at 150 °C for 1 h.

### **Catalyst test**

Conversion of methanol to aromatics was carried out in a fixed-bed reactor with an inner diameter of 10 mm. The catalyst was pressed and crushed to 20 – 40 mesh. The reaction conditions are as follows: 1.5 g catalyst, 390 °C, 0.5 MPa, weight hourly space velocity (WHSV) of methanol of  $3.2 \text{ h}^{-1}$ . Before the reaction, the catalyst was pretreated at 390 °C for 10 h in a nitrogen flow ( $30 \text{ mL min}^{-1}$ ). The gas and liquid products were separated with a cold trap. The gaseous products were on-line analyzed by an Agilent 7890A gas chromatograph equipped with one thermal conductivity (TCD) and two flame ionization detectors (FID) and two capillary columns (J&W 127-7031,  $30 \text{ m} \times 530 \text{ }\mu\text{m} \times 0.25 \text{ }\mu\text{m}$ ; Agilent 19095P-S25,  $50 \text{ m} \times 530 \text{ }\mu\text{m} \times 15 \text{ }\mu\text{m}$ ). The liquid organic products were analyzed by another Agilent 7890A gas chromatograph equipped with one FID and one capillary column (Agilent 19091S-001,  $50 \text{ m} \times 200 \text{ }\mu\text{m} \times 0.5 \text{ }\mu\text{m}$ ). The aqueous products, including mainly water, methanol and oxygenates, were analyzed by the third Agilent 7890A gas chromatograph equipped with one TCD, one FID and one capillary column (Agilent 19091N-136,  $60 \text{ m} \times 250 \text{ }\mu\text{m} \times 0.25 \text{ }\mu\text{m}$ ).

---

## Table of contents

□1 □<sup>27</sup>Al MAS NMR spectra of (a) ZSM-h(0), (b) ZSM-h(20), (c) ZSM-h(22), (d) ZSM-h(26), (e) ZSM-h(38) (Fig.S1);

□2 □Magnified SEM images (a, c, d, e, and f) of (a) ZSM-5-h(22), box 1 in Fig.4c, (c) shell of ZSM-5-h(24), box 2 in Fig. 4d, (d) core of ZSM-5-h(24), box 3 in Fig. 4d, (e) shell of ZSM-5-h(26), box 4 in Fig. 4e, (f) core of ZSM-5-h(26) , box 5 in Fig. 4e; and SEAD pattern of (b) ZSM-5-h(22), red box of shell (Fig.S2);

□3 □(A) XRD patterns of the samples synthesized by adding different amounts of NaCl: (a)  $[\text{NaCl}]/[\text{SiO}_2] = 0.1$ , (b)  $[\text{NaCl}]/[\text{SiO}_2] = 0.12$ , (c)  $[\text{NaCl}]/[\text{SiO}_2] = 0.16$ , (d)  $[\text{NaCl}]/[\text{SiO}_2] = 0.28$  and (e)  $[\text{NaCl}]/[\text{SiO}_2] = 0.44$ ; (B) XRD patterns of the samples synthesized by adding different amounts of Na<sub>2</sub>-EDTA: (f)  $[\text{Na}_2\text{-EDTA}]/[\text{SiO}_2] = 0$ , (g)  $[\text{Na}_2\text{-EDTA}]/[\text{SiO}_2] = 0.05$ , (h)  $[\text{Na}_2\text{-EDTA}]/[\text{SiO}_2] = 0.06$ , (i)  $[\text{Na}_2\text{-EDTA}]/[\text{SiO}_2] = 0.08$ , (j)  $[\text{Na}_2\text{-EDTA}]/[\text{SiO}_2] = 0.11$ , (k)  $[\text{Na}_2\text{-EDTA}]/[\text{SiO}_2] = 0.15$ ; (C) the crystallinities of the samples synthesized by adding different amounts of NaCl; and (D) the crystallinities of the samples synthesized by adding different amounts of Na<sub>2</sub>-EDTA (Fig.S3);

□4 □(A) Si concentrations, (B) Al concentrations and (C) Si/Al ratios of the mother liquor of the synthesis system added different amounts of NaCl (Fig.S4);

□5 □(A) Si concentrations, (B) Al concentrations and (C) Si/Al ratios of the mother liquor of the synthesis system added different amounts of Na<sub>2</sub>-EDTA (Fig.S5);

□6 □XRD patterns of the samples synthesized at the pH value of (1, 4) 8.5, (2, 5) 10.5, (3, 6) 12.5 with the synthesis gels added (A) Na<sub>2</sub>-EDTA but no butylamine template; (B) NaCl but on butylamine template (Fig.S6);

□7 □SEM images of samples synthesized with the synthesis gels added different amounts of Na<sub>2</sub>-EDTA: (a)  $[\text{Na}_2\text{-EDTA}]/[\text{SiO}_2] = 0$ , pH was adjusted to 8.5 with concentrated sulfuric

---

acid, (b)  $[\text{Na}_2\text{-EDTA}]/[\text{SiO}_2] = 0.05$ , (c)  $[\text{Na}_2\text{-EDTA}]/[\text{SiO}_2] = 0.06$ , (d)  $[\text{Na}_2\text{-EDTA}]/[\text{SiO}_2] = 0.11$ , (e)  $[\text{Na}_2\text{-EDTA}]/[\text{SiO}_2] = 0.15$  and (f)  $[\text{Na}_2\text{-EDTA}]/[\text{SiO}_2] = 0$ , without adjustment of pH value (9.3) with concentrated sulfuric acid (Fig.S7);

(8) TG curves of (A) deactivated HZSM-5-c1 and (B) H-ZSM-5-h(38) (Fig.S8);

□9□(A)  $\text{NH}_3$ -TPD profiles and (B) Py-IR spectra of HZSM-5-h(38) and HZSM-5-c1 (Fig.S9);

□10□ $^{27}\text{Al}$  MAS NMR spectra of HZSM-5-h(38) and HZSM-5-c1 (Fig.S10);

□11□Nitrogen adsorption-desorption isotherms of HZSM-5-h(38) and HZSM-5-c1 (Fig.S11);

□12□Schematic illustration of the catalytic reaction process over ZSM-5 hollow spheres (Fig.S12);

(13) Chemical compositions of the gels for synthesis of different samples (Table S1);

(14)  $^{29}\text{Si}$  MAS NMR data, framework and bulk Si/Al ratios of ZSM-5-h(n) samples (Table S2);

(15) Product distributions obtained over HZSM-5(38) and HZSM-5-c1 in methanol-to-aromatics process (Table S3);

(16) Acidic and textural properties of HZSM-5(38) and HZSM-5-c1 (Table S4);

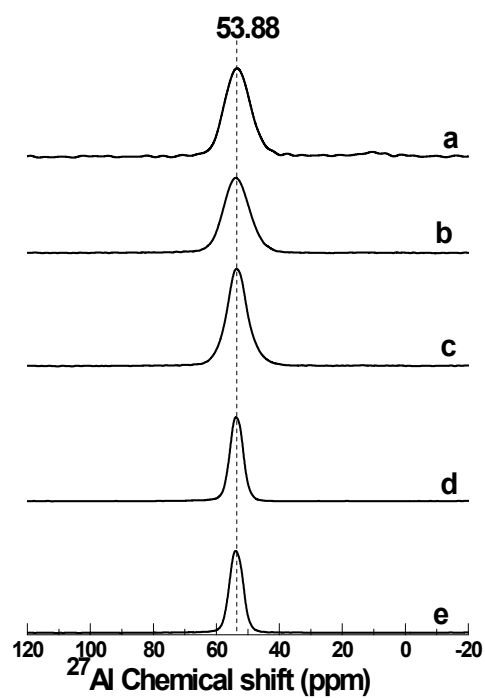

**Fig.S1**  $^{27}\text{Al}$  MAS NMR spectra of (a) ZSM-h(0), (b) ZSM-h(20), (c) ZSM-h(22), (d) ZSM-h(26), (e) ZSM-h(38).

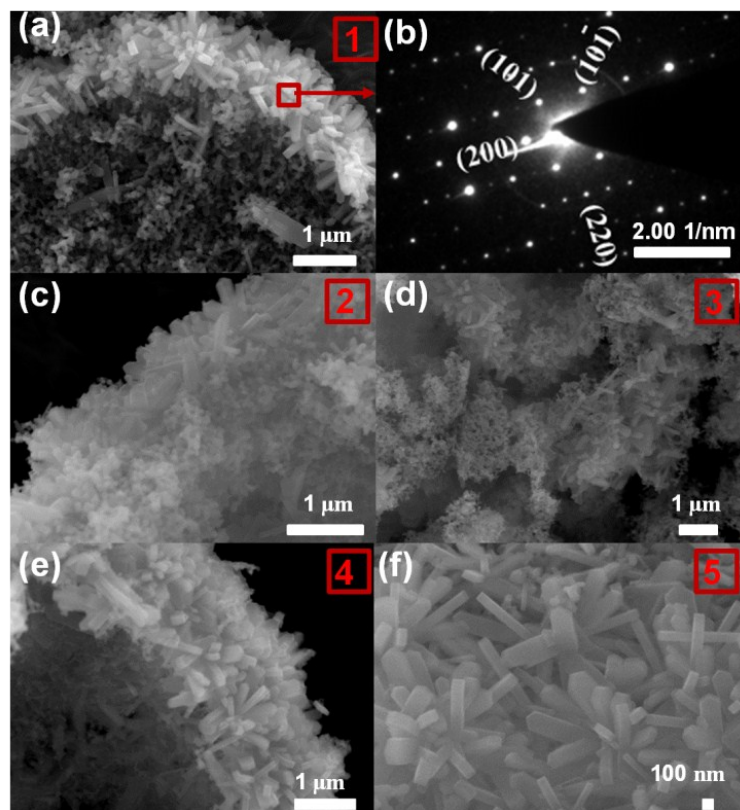

**Fig.S2** Magnified SEM images (a, c, d, e, and f) of (a) ZSM-5-h(22), box 1 in Fig.4c, (c) shell of ZSM-5-h(24), box 2 in Fig. 4d, (d) core of ZSM-5-h(24), box 3 in Fig. 4d, (e) shell of ZSM-5-h(26), box 4 in Fig. 4e, (f) core of ZSM-5-h(26) , box 5 in Fig. 4e; and SEAD pattern of (b) ZSM-5-h(22), red box of shell.



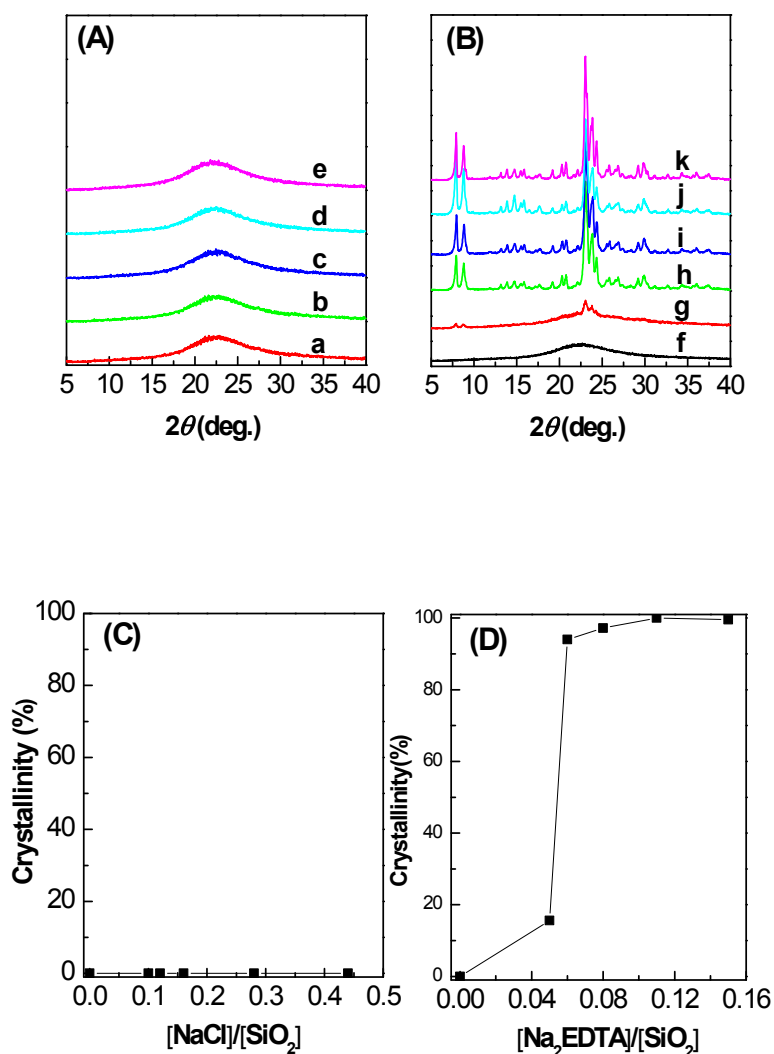

**Fig.S3** (A) XRD patterns of the samples synthesized by adding different amounts of NaCl: (a)  $[\text{NaCl}]/[\text{SiO}_2] = 0.1$ , (b)  $[\text{NaCl}]/[\text{SiO}_2] = 0.12$ , (c)  $[\text{NaCl}]/[\text{SiO}_2] = 0.16$ , (d)  $[\text{NaCl}]/[\text{SiO}_2] = 0.28$  and (e)  $[\text{NaCl}]/[\text{SiO}_2] = 0.44$ ; (B) XRD patterns of the samples synthesized by adding different amounts of  $\text{Na}_2\text{-EDTA}$ : (f)  $[\text{Na}_2\text{-EDTA}]/[\text{SiO}_2] = 0$ , (g)  $[\text{Na}_2\text{-EDTA}]/[\text{SiO}_2] = 0.05$ , (h)  $[\text{Na}_2\text{-EDTA}]/[\text{SiO}_2] = 0.06$ , (i)  $[\text{Na}_2\text{-EDTA}]/[\text{SiO}_2] = 0.08$ , (j)  $[\text{Na}_2\text{-EDTA}]/[\text{SiO}_2] = 0.11$ , (k)  $[\text{Na}_2\text{-EDTA}]/[\text{SiO}_2] = 0.15$ ; (C) the crystallinities of the samples synthesized by adding different amounts of NaCl; and (D) the crystallinities of the samples synthesized by adding different amounts of  $\text{Na}_2\text{-EDTA}$ .

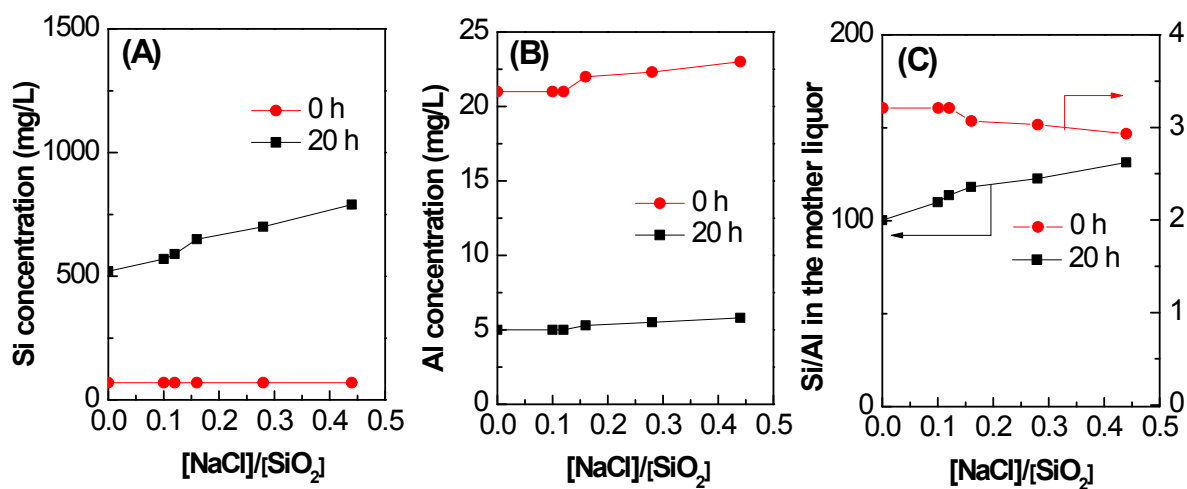

**Fig.S4** (A) Si concentrations, (B) Al concentrations and (C) Si/Al ratios of the mother liquor of the synthesis system added different amounts of NaCl.

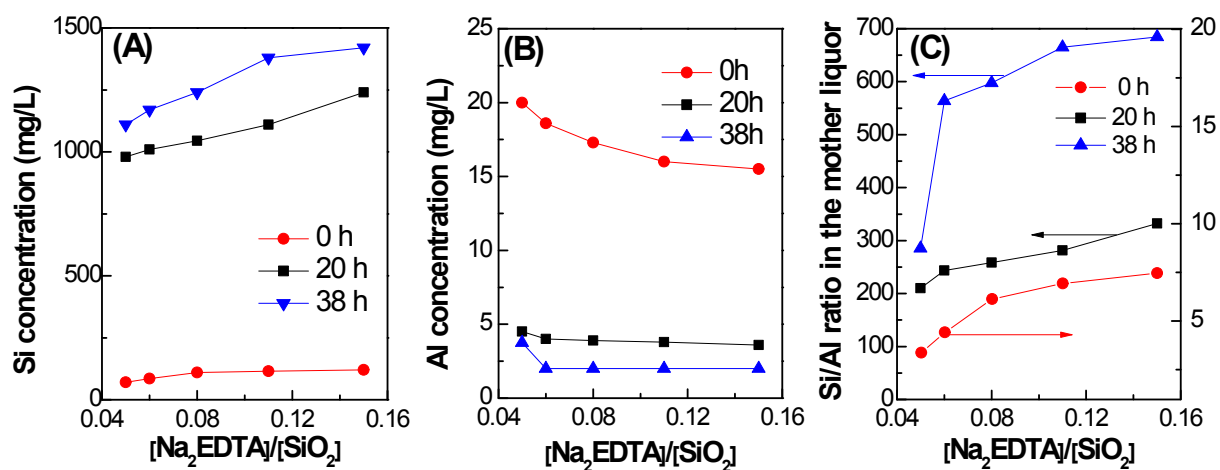

**Fig.S5** (A) Si concentrations, (B) Al concentrations and (C) Si/Al ratios of the mother liquor of the synthesis system added different amounts of  $\text{Na}_2\text{-EDTA}$ .

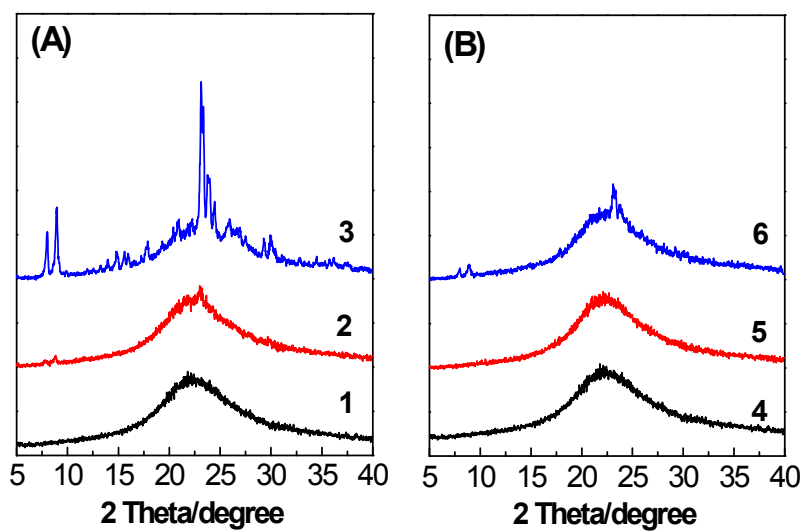

**Fig.S6** XRD patterns of the samples synthesized at the pH value of (1, 4) 8.5, (2, 5) 10.5, (3, 6) 12.5 with the synthesis gels added (A)  $\text{Na}_2\text{-EDTA}$  but no butylamine template; (B)  $\text{NaCl}$  but on butylamine template.

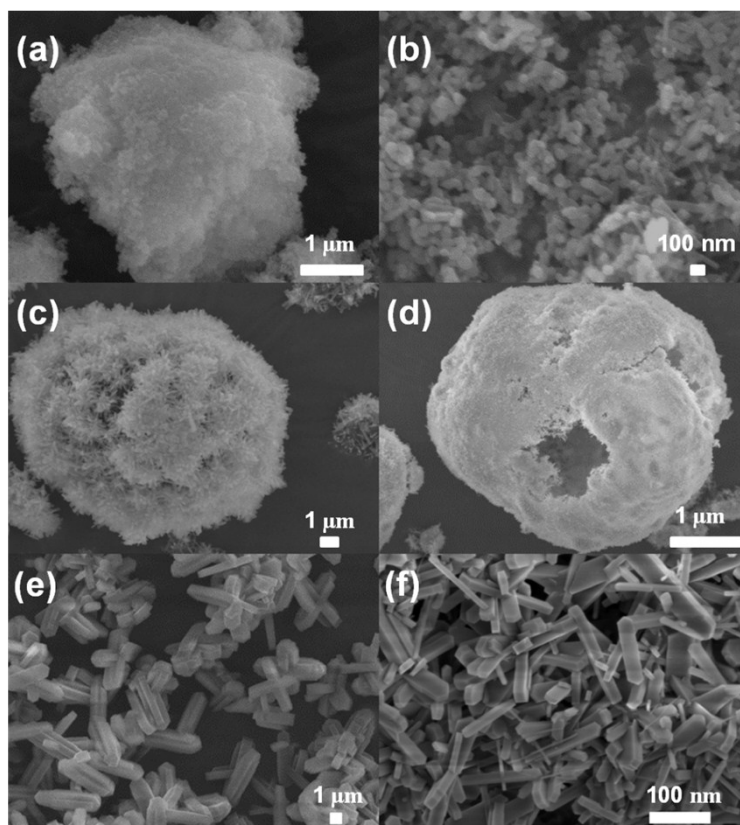

**Fig.S7** SEM images of samples synthesized with the synthesis gels added different amounts of Na<sub>2</sub>-EDTA: (a) [Na<sub>2</sub>-EDTA]/[SiO<sub>2</sub>] = 0, pH was adjusted to 8.5 with concentrated sulfuric acid, (b) [Na<sub>2</sub>-EDTA]/[SiO<sub>2</sub>] = 0.05, (c) [Na<sub>2</sub>-EDTA]/[SiO<sub>2</sub>] = 0.06, (d) [Na<sub>2</sub>-EDTA]/[SiO<sub>2</sub>] = 0.11, (e) [Na<sub>2</sub>-EDTA]/[SiO<sub>2</sub>] = 0.15 and (f) [Na<sub>2</sub>-EDTA]/[SiO<sub>2</sub>] = 0, without adjustment of pH value (9.3) with concentrated sulfuric acid.

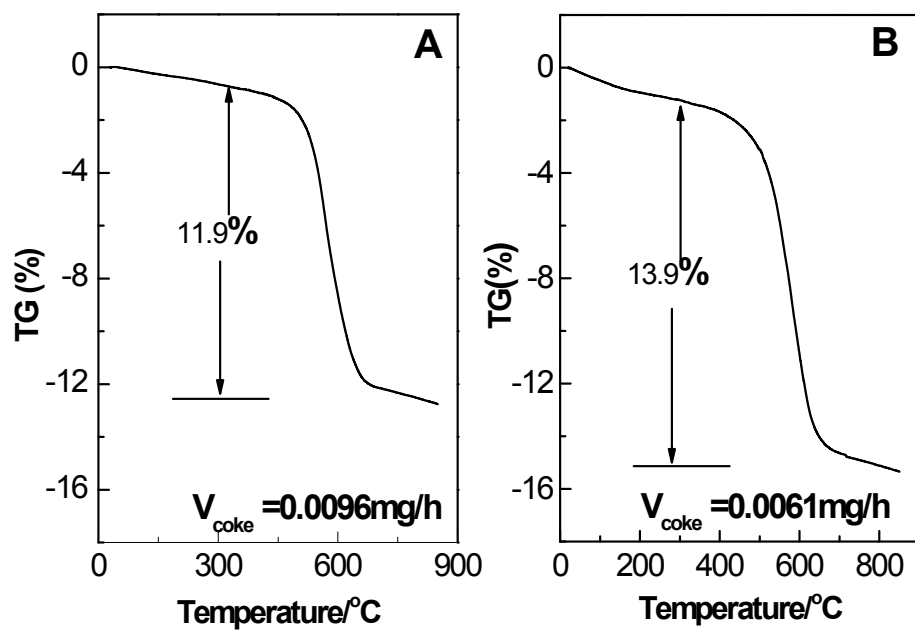

**Fig.S8** TG curves of (A) deactivated HZSM-5-c1 and (B) H-ZSM-5-h(38).

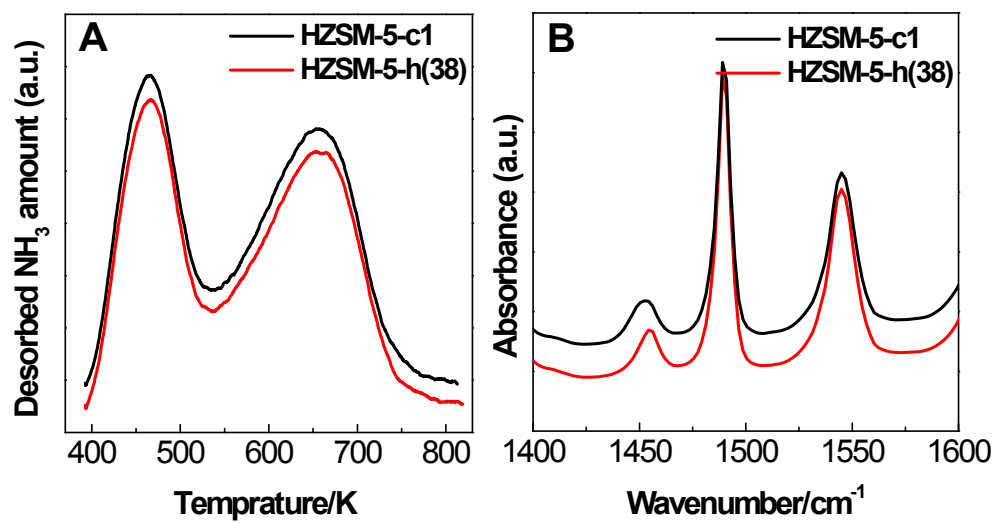

**Fig.S9** (A)  $\text{NH}_3$ -TPD profiles and (B) Py-IR spectra of HZSM-5-h(38) and HZSM-5-c1.

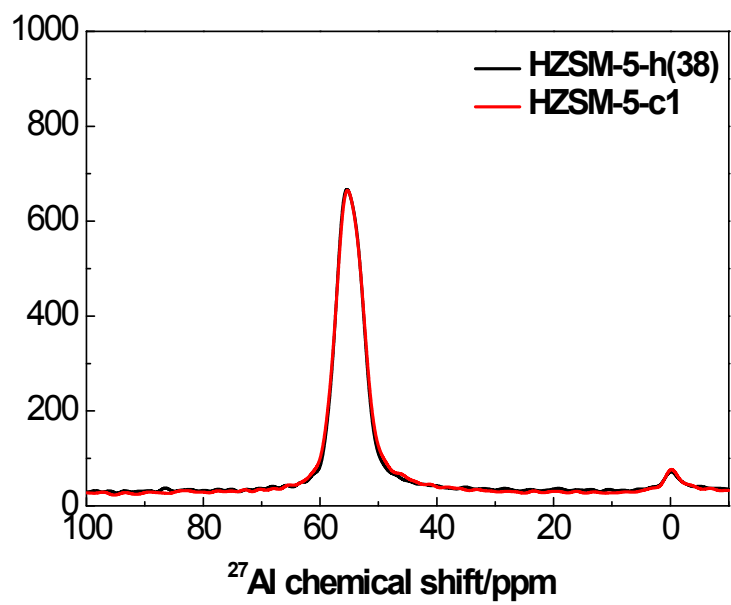

**Fig.S10**  $^{27}\text{Al}$  MAS NMR spectra of HZSM-5-h(38) and HZSM-5-c1.



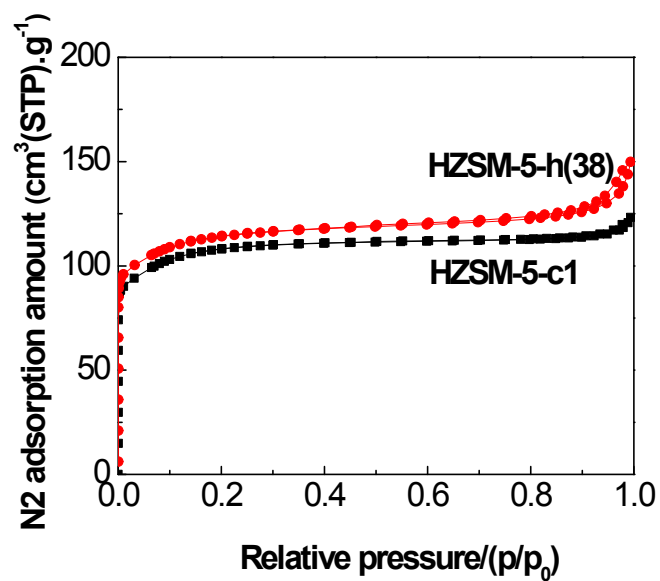

**Fig.S11** Nitrogen adsorption-desorption isotherms of HZSM-5-h(38) and HZSM-5-c1.

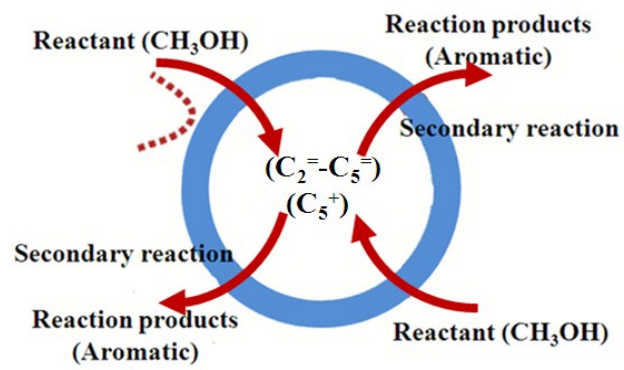

**Fig.S12** Schematic illustration of the catalytic reaction process over ZSM-5 hollow spheres.

**Table S1.** Chemical compositions of the gels for synthesis of different samples.

| Samples  | Chemical compositions (molar ratio)                                                                                                      | pH               |
|----------|------------------------------------------------------------------------------------------------------------------------------------------|------------------|
| ZSM-5-h  | SiO <sub>2</sub> : 0.014 Al <sub>2</sub> O <sub>3</sub> : 0.09 Na <sub>2</sub> O: 31H <sub>2</sub> O: 0.15NBA: 0.08Na <sub>2</sub> EDTA  | 8.5              |
| ZSM-5-a1 | SiO <sub>2</sub> : 0.014 Al <sub>2</sub> O <sub>3</sub> : 0.09 Na <sub>2</sub> O: 31H <sub>2</sub> O: 0.15NBA: 0.10NaCl                  | 8.5 <sup>a</sup> |
| ZSM-5-a2 | SiO <sub>2</sub> : 0.014 Al <sub>2</sub> O <sub>3</sub> : 0.09 Na <sub>2</sub> O: 31H <sub>2</sub> O: 0.15NBA: 0.12NaCl                  | 8.5 <sup>a</sup> |
| ZSM-5-a3 | SiO <sub>2</sub> : 0.014 Al <sub>2</sub> O <sub>3</sub> : 0.09 Na <sub>2</sub> O: 31H <sub>2</sub> O: 0.15NBA: 0.16NaCl                  | 8.5 <sup>a</sup> |
| ZSM-5-a4 | SiO <sub>2</sub> : 0.014 Al <sub>2</sub> O <sub>3</sub> : 0.09 Na <sub>2</sub> O: 31H <sub>2</sub> O: 0.15NBA: 0.28NaCl                  | 8.5 <sup>a</sup> |
| ZSM-5-a5 | SiO <sub>2</sub> : 0.014 Al <sub>2</sub> O <sub>3</sub> : 0.09 Na <sub>2</sub> O: 31H <sub>2</sub> O: 0.15NBA: 0.44NaCl                  | 8.5 <sup>a</sup> |
| ZSM-5-b1 | SiO <sub>2</sub> : 0.014 Al <sub>2</sub> O <sub>3</sub> : 0.09 Na <sub>2</sub> O: 31H <sub>2</sub> O: 0.15NBA                            | 8.5 <sup>a</sup> |
| ZSM-5-b2 | SiO <sub>2</sub> : 0.014 Al <sub>2</sub> O <sub>3</sub> : 0.09 Na <sub>2</sub> O: 31H <sub>2</sub> O: 0.15NBA: 0.05Na <sub>2</sub> EDTA  | 8.5 <sup>a</sup> |
| ZSM-5-b3 | SiO <sub>2</sub> : 0.14 Al <sub>2</sub> O <sub>3</sub> : 0.09 Na <sub>2</sub> O: 31H <sub>2</sub> O: 0.15NBA: 0.06 Na <sub>2</sub> EDTA  | 8.5 <sup>a</sup> |
| ZSM-5-b4 | SiO <sub>2</sub> : 0.014 Al <sub>2</sub> O <sub>3</sub> : 0.09 Na <sub>2</sub> O: 31H <sub>2</sub> O: 0.15NBA: 0.11 Na <sub>2</sub> EDTA | 8.5 <sup>b</sup> |
| ZSM-5-b5 | SiO <sub>2</sub> : 0.014 Al <sub>2</sub> O <sub>3</sub> : 0.09 Na <sub>2</sub> O: 31H <sub>2</sub> O: 0.15NBA: 0.15 Na <sub>2</sub> EDTA | 8.5 <sup>b</sup> |
| ZSM-5-c1 | SiO <sub>2</sub> : 0.014 Al <sub>2</sub> O <sub>3</sub> : 0.05 Na <sub>2</sub> O: 31H <sub>2</sub> O: 0.15NBA                            | 9.3              |

<sup>a</sup> The pH value was adjusted with concentrated sulfuric acid;

<sup>b</sup> The pH value was adjusted with NaOH aqueous solution (5 mol/L).

**Table S2.**  $^{29}\text{Si}$  MAS NMR data, framework and bulk Si/Al ratios of ZSM-5-h(n) samples.

| Samples     | Resonance (%)  |                |                |             | Si/Al                  |                   |
|-------------|----------------|----------------|----------------|-------------|------------------------|-------------------|
|             | Q <sup>2</sup> | Q <sup>3</sup> | Q <sup>4</sup> | Si(3Si,1Al) | Framework <sup>a</sup> | Bulk <sup>b</sup> |
| ZSM-5-h(0)  | 1.4            | 4.1            | 84.5           | 10.5        | --                     | 35.7              |
| ZSM-5-h(20) | 3.7            | 10.9           | 72.4           | 13.0        | --                     | 31.9              |
| ZSM-5-h(22) | 1.8            | 2.7            | 82.6           | 12.8        | --                     | 31.0              |
| ZSM-5-h(26) | 0              | 2.0            | 85.3           | 12.7        | 31.5                   | 31.4              |
| ZSM-5-h(38) | 0              | 1.0            | 86.2           | 12.8        | 31.3                   | 31.5              |

<sup>a</sup> Determined by  $^{29}\text{Si}$  MAS NMR data;

<sup>b</sup> Analyzed with ICP.

---

**Table S3.** Product distributions obtained over HZSM-5(38) and HZSM-5-c1 in methanol-to-aromatics process.

---

| Samples      | Production selectivity (%)                               |                                                          |                             |           |        |
|--------------|----------------------------------------------------------|----------------------------------------------------------|-----------------------------|-----------|--------|
|              | C <sub>1</sub> <sup>-</sup> -C <sub>4</sub> <sup>-</sup> | C <sub>2</sub> <sup>=</sup> -C <sub>5</sub> <sup>=</sup> | C <sub>5</sub> <sup>+</sup> | Aromatics | Others |
| HZSM-5-h(38) | 37.7                                                     | 4.9                                                      | 16.1                        | 40.1      | 1.3    |
| HZSM-5-c1    | 35.4                                                     | 6.3                                                      | 23.2                        | 33.9      | 1.2    |

---

Reaction conditions: 390 °C, 0.5 MPa, WHSV<sub>methanol</sub> of 3.2 h<sup>-1</sup>.

The data were acquired at the time on stream (TOS) of 12 h, and the methanol conversions in both cases are higher than 99.5%.

---

**Table S4.** Acidic and textural properties of HZSM-5(38) and HZSM-5-c1.

---

| Samples      | Acid sites (mol·g <sup>-1</sup> ) |       |       |          |       | S <sub>BET</sub><br>(m <sup>2</sup> ·g <sup>-1</sup> ) | V <sub>micro</sub><br>(cm <sup>3</sup> ·g <sup>-1</sup> ) | V <sub>meso</sub><br>(cm <sup>3</sup> ·g <sup>-1</sup> ) |
|--------------|-----------------------------------|-------|-------|----------|-------|--------------------------------------------------------|-----------------------------------------------------------|----------------------------------------------------------|
|              | Strong                            | Weak  | Total | Brønsted | Lewis |                                                        |                                                           |                                                          |
| HZSM-5-h(38) | 0.453                             | 0.292 | 0.745 | 0.304    | 0.048 | 349                                                    | 0.10                                                      | 0.16                                                     |
| HZSM-5-c1    | 0.444                             | 0.296 | 0.740 | 0.315    | 0.059 | 341                                                    | 0.10                                                      | 0.10                                                     |

---
